# Supplementary material for: Ndufaf5 deficiency in the Dictyostelium model: new roles in autophagy and development
Source: PubMed Central journal article supplement — Mol Biol Cell. 2013 May 15;24(10):1519–28. doi: 10.1091/mbc.E12-11-0796 (PMC3655813; doi:10.1091/mbc.e12-11-0796), 2013-05-15
Supplement: supp_E12-11-0796v1_CombinedSupMats.pdf [file supp_E12-11-0796v1_CombinedSupMats.pdf]

## Supplementary Figures

**FIGURE S1. Bioinformatic analyses of Ndufaf5 and BioC.** (A) Alignment of Ndufaf5 and BioC proteins suggests that they might be truly orthologs. Figure shows both Ndufaf5 isoforms from human, *Dictyostelium* Ndufaf5 and BioC proteins from *E.coli* and *C.crescentus*. Grey intensity represents the identity percentage. Asterisks represent conserved amino acids cited in the text (G86, L165 and L235). (B) Phylogenetic tree of Ndufaf5-BioC family. Ndufaf5 protein from human, *D.discoideum* and a representative group of orthologs in  $\alpha$ ,  $\beta$  and  $\gamma$ -proteobacteria (19 proteins), obtained previously using Blast, were used. Branch lengths represent % of evolution. The number between brackets are Uniprot entries. NA, Not Annotated.

**FIGURE S2. *ndufaf5*<sup>-</sup> growth rates are complemented in *ndufaf5*<sup>-</sup> Rescue strain but not by AMPK inhibition.** (A) Growth rates in association with bacteria (SM plates) were obtained from at least 3 independent experiments. Numbers between brackets indicate the copy number of the AMPK<sup>as</sup> construct. (B) A representative experiment of growth in HL5 liquid medium is shown. Numbers between brackets indicate the copy number of the AMPK<sup>as</sup> construct.

### FIGURE S3.

Confocal analyses of GFP-Atg18 and mitochondria I. Wild-type, *ndufaf5*<sup>-</sup> and *midA*<sup>-</sup> growing cells transfected with the autophagic marker GFP-Atg18 were stained with the mitochondrial marker Mitotracker Red, fixed and visualized by confocal microscopy. No colocalization was observed. Bar, 10  $\mu$ m.

**FIGURE S4.** Confocal analyses of GFP-Atg18 and mitochondria II. Wild-type, *ndufaf5*<sup>-</sup> and *midA*<sup>-</sup> growing cells transfected with the autophagic marker GFP-Atg18 were fixed, stained with DAPI and visualized by confocal microscopy. Nuclei and mitochondria were stained by DAPI (Red color was assigned to the fluorescence emission of DAPI). The signal was not found to colocalize with GFP-Atg18 puncta. Bar, 10  $\mu$ m.

A

|                                |                                                                                                       |       |
|--------------------------------|-------------------------------------------------------------------------------------------------------|-------|
| <i>D. discoideum</i> Ndufaf5   | 28 YTKMT IFD TNVKT IQKNNTVTNVDDPKHYDYL MNEVADR LADR ILD IKD IKCGNVLD PFSRNGALFKY IQ EKGAK IDKYYMVESSE | E114  |
| <i>H. sapiens</i> Ndufaf5      | 41 PRTLNI FDRDLKRRQKN-WAARQPEPTKFDY LKEEVGSRIADRVD IPRNFP-LALDLCCGRGYIAQYLN-----                      | KE110 |
| <i>H. sapiens</i> Ndufaf5-iso2 | 41 PRTLNI FDRDLKRRQKN-WAARQPEPTKFDY LKEEVGSRIADRVD IPRNFP-LALDLCCGRGYIAQYLN-----                      | KL110 |
| <i>C. crescentus</i> BioC      | 2 TASP LLEDRALLRRLKDRRAAP---EFGAADFLKARAAQDVMVRLLETILRRFP-IAVDLGA RGNHFFKALSE---                      | 68    |
| <i>E. coli</i> BioC            | 1-----MATV NKQAIAAAFGRAAAHYEQHADLQ RQSADALLAML P---QRKYT-HVLDAGCGPGWMSRHW RER-----                    | 63    |
|                                |                                                                                                       | *     |
|                                | 115 LLYRDDNNV SQENEDDNNNNKVKPTK-----ILVNSLEDK IEGIEDQSLDL IISNLSLHWVNDLPGVFGGLKRLLKFP                 | 186   |
|                                | 111 TIGKFFQAD IAENALKNSSSETEIPTV-----SVL--ADEEFLPFKENTFDLVVSSL SLHWVNDLPRALEQ IHYILKFP                | 180   |
|                                | 111 QLFHCRK LLESFSKLT-----LQKMLCLHWVNDLPRALEQ IHYILKFP                                                | 152   |
|                                | 69--SDARAN IDTLIEADLSGRMLAGRE-----TLRLVAD EERLPFGDATLDLLVSTLSLHWVNDLVGALIQIRRALRFP                    | 138   |
|                                | 64 HAQV TALDLSPPMLVQARQKDAAD-----HYLAGD IESLEPLATATFDLAWSHLAVQVCGNLESTALRELYRVVRF                     | 132   |
|                                |                                                                                                       | *     |
|                                | 187 NGVFLASLPGEDTLMELKDSYLA EIEREGGFSPHVSPF TKISDIGNILSKNRYTLPTVDTEKIT INYDNNFVLMRDLQNNGENNA          | I273  |
|                                | 181 DGVFIGAMFGGDTLYELRCSLQ LAETEREGGFSPHISPFTAVNDLGHLLGRAGFNTLTVDTDEIQVNYPGH FELMEDLQGMGESNCA         | 267   |
|                                | 153 DGVFIGAMFGGDTLYELRCSLQ LAETEREGGFSPHISPFTAVNDLGHLLGRAGFNTLTVDTDEIQVNYPGH FELMEDLQGMGESNCA         | 239   |
|                                | 139 DGLVEGALFEGGATLTELRCCLLAAEAELTDGAAMRVSPFADA IDAAGLLRAGFALPVADVDRVKVRYAHP IALLRDLRKMGETSVL         | 225   |
|                                | 133 KGVVAFTTLVQGSLELHQAWQAVD---ERPHANRELP PDEIEQSLNG---VHYHHIQPI TLFWDDALSAMRSKXIGATHLH               | 210   |
|                                |                                                                                                       | *     |
|                                | 274 LKR-R-----NYTSKDTFLAASA IYKHL YGNEDNNSIPATFQ IYILIGWAPHESQOKPLQRGSAKKHFSE                         | 337   |
|                                | 268 WNR-K-----ALLHRDTMLAAA AVYREMYRNEDEG-SVPATYQ IYYMIGWKYHESQARPAERGSATV SFGE                        | 330   |
|                                | 240 WNR-K-----ALLHRDTMLAAA AVYREMYRNEDEG-SVPATYQ IYYMIGWKYHESQARPAERGSATV SFGE                        | 302   |
|                                | 226 LDRSR-----KPLTRKVLFRAMELYVERFAEADG-KVPA TFEIVSVTGWAPHDSQOKPLRPGSAKMR LAD                          | 289   |
|                                |                                                                                                       | 251   |

B

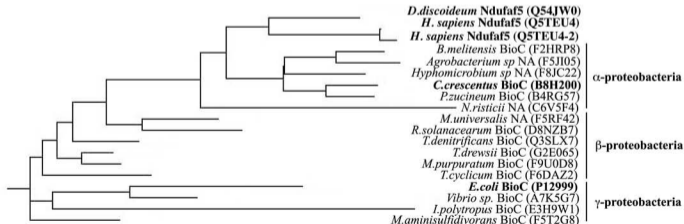

**A**

## GROWTH ON PLATE

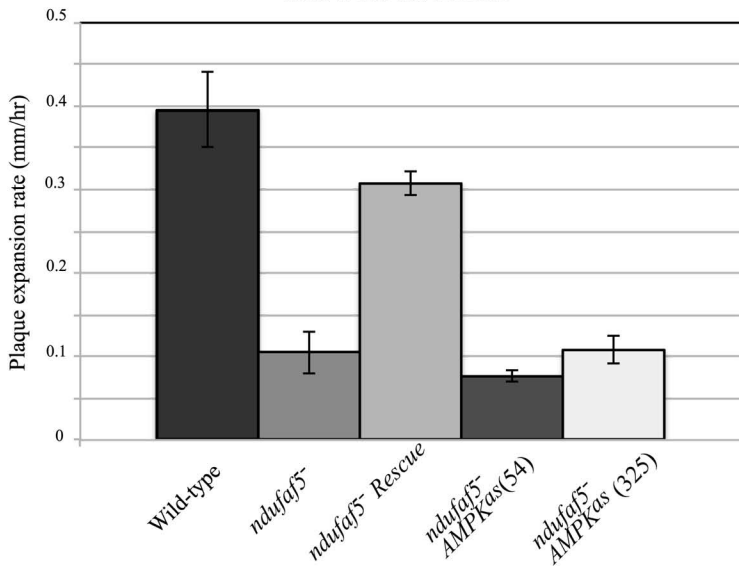**B**

## GROWTH IN LIQUID MEDIUM

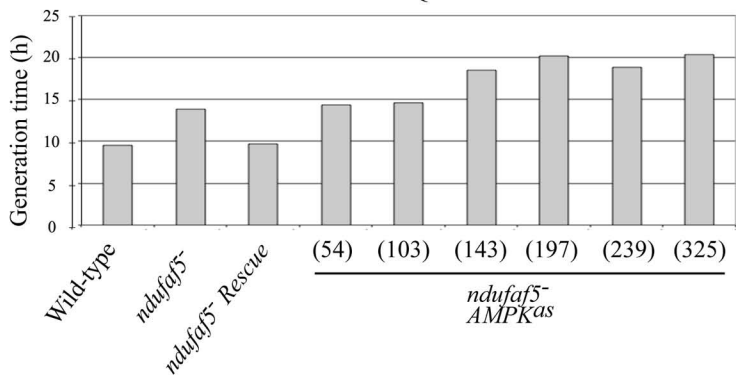

GFP-Atg18

Mitotracker Red

Merge

WT

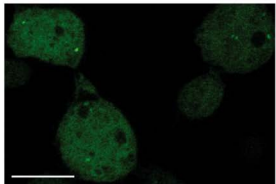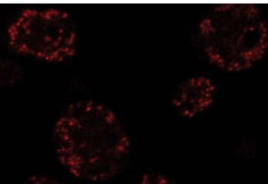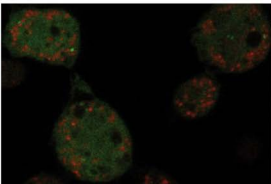*ndufaf5*<sup>-</sup>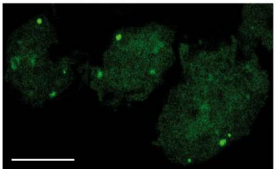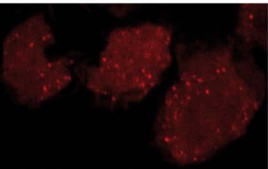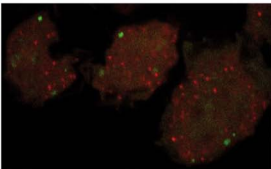*midA*<sup>-</sup>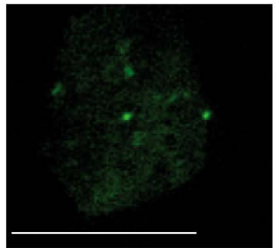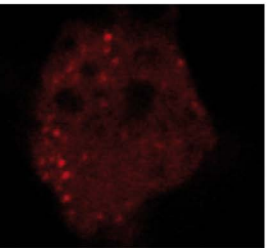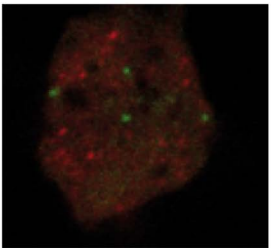

GFP-Atg18

DAPI

Merge

WT

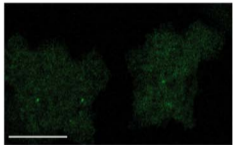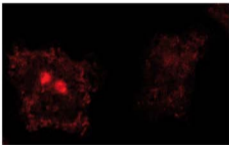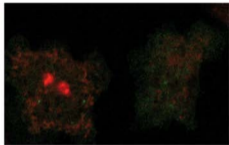*ndufaf5*<sup>-</sup>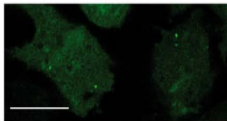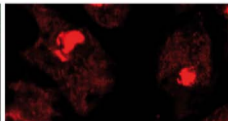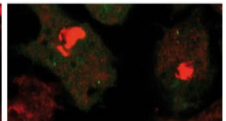*midA*<sup>-</sup>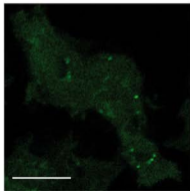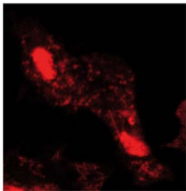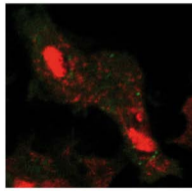

TABLE S1. Oligonucleotides used for KO verification and site- directed mutagenesis

| <b>EXPERIMENT</b>              | <b>OLIGO FORWARD</b>                  | <b>OLIGO REVERSE</b>                      |
|--------------------------------|---------------------------------------|-------------------------------------------|
| <b>GENOMIC KO VERIFICATION</b> | 1. AACTTGAGAATCCAATAGTTGC             | 2. CAAATAATAATTAACCAACCCAAG               |
| <b>RNA KO VERIFICATION</b>     | 3.TAGGATCCATGTTAAGAACAACATTTAGAAAAGG  | 4. CCCAATGTAATGAGAAATTACTTATAATTAATC      |
| <b>CONTROL (DDB_G0268840)</b>  | 5.CGGGATCCGCATGTAACATCCAAAGATTTTAG    | 6.CGGGATCCCTATATTATTATTTTTTAATAAATCAAATGG |
| <b>DIRECTED MUTAGENESIS M1</b> | 7.GGTAATGTTTTAGATTTTGTAGTAGAAATGGAGC  | 8.GCTCCATTTCTACTAACAAAATCTAAAACATTACC     |
| <b>DIRECTED MUTAGENESIS M2</b> | 9. GATTAATTATAAGTAATTTCTCATTACATTGGG  | 10. CCCAATGTAATGAGAAATTACTTATAATTAATC     |
| <b>DIRECTED MUTAGENESIS M3</b> | 11. GATATTGGTAACATTCCATCAAAGAATAGATAC | 12. GTATCTATTCTTTGATGGAATGTTACCAATATC     |

| Organism                | E-value | Eukaryote | Bacteria            | GenBank accession |
|-------------------------|---------|-----------|---------------------|-------------------|
| <i>Polysphondylium</i>  | 7e-102  | Metazoa   |                     | EFA86651.1        |
| <i>Drosophila</i>       | 3e-67   | Metazoa   |                     | NP_610922.1       |
| <i>Laccaria</i>         | 6e-66   | Fungi     |                     | XP_001877001.1    |
| <i>Danio rerio</i>      | 3e-65   | Metazoa   |                     | NP_001076363.1    |
| <i>Xenopus</i>          | 2e-64   | Metazoa   |                     | NP_001016398.1    |
| <i>Homo sapiens</i>     | 6e-62   | Metazoa   |                     | NP_077025.2       |
| <i>Mus musculus</i>     | 2e-60   | Metazoa   |                     | NP_081369.2       |
| <i>Anopheles</i>        | 4e-60   | Metazoa   |                     | XP_309862.3       |
| <i>Aspergillus</i>      | 8e-60   | Fungi     |                     | XP_662522.1       |
| <i>Neurospora</i>       | 4e-57   | Fungi     |                     | XP_956725.2       |
| <i>Pichia</i>           | 9e-54   | Fungi     |                     | XP_002492537.1    |
| <i>Yarrowia</i>         | 5e-51   | Fungi     |                     | XP_501354.1       |
| <i>Oriza sativa</i>     | 2e-50   | Plantae   |                     | EEC69002.1        |
| <i>Vitis vinifera</i>   | 4e-50   | Plantae   |                     | XP_002279511.1    |
| <i>Arabidopsis</i>      | 1e-46   | Plantae   |                     | XP_002890535.1    |
| <i>Rhodospirillum</i>   | 5e-46   |           | alphaproteobacteria | YP_425827.1       |
| <i>Magnetospirillum</i> | 1e-45   |           | alphaproteobacteria | YP_420968.1       |
| <i>Rhodomicrobium</i>   | 1e-45   |           | alphaproteobacteria | YP_004013051.1    |
| <i>Ochrobactrum</i>     | 4e-45   |           | alphaproteobacteria | YP_001369577.1    |
| <i>Brucella</i>         | 6e-44   |           | alphaproteobacteria | YP_001628309.1    |
| <i>Agrobacterium</i>    | 3e-41   |           | alphaproteobacteria | NP_357097.2       |
| <i>Caenorhabditis</i>   | 7e-41   | Metazoa   |                     | NP_496949.1       |
| <i>Rhodoseudomonas</i>  | 1e-40   |           | alphaproteobacteria | YP_530416.1       |
| <i>Rickettsi</i>        | 4e-19   |           | alphaproteobacteria | YP_001492229.1    |

**TABLE S2.** Phylogenetic distribution of Ndufaf5 homologous proteins. *Dictyostelium* Ndufaf5 protein was subjected to Blast and representative homologous showing significant E-values and covering most of the sequence were selected from prokaryotes, metazoan, plants and fungi kingdoms.
